# Supplementary material for: Mitochondrial Bioenergetic, Photobiomodulation and Trigeminal Branches Nerve Damage, What’s the Connection? A Review
Source: MDPI journal article supplement (doi:10.3390/ijms22094347), 2021-04-21
Supplement: s1 [file s1]

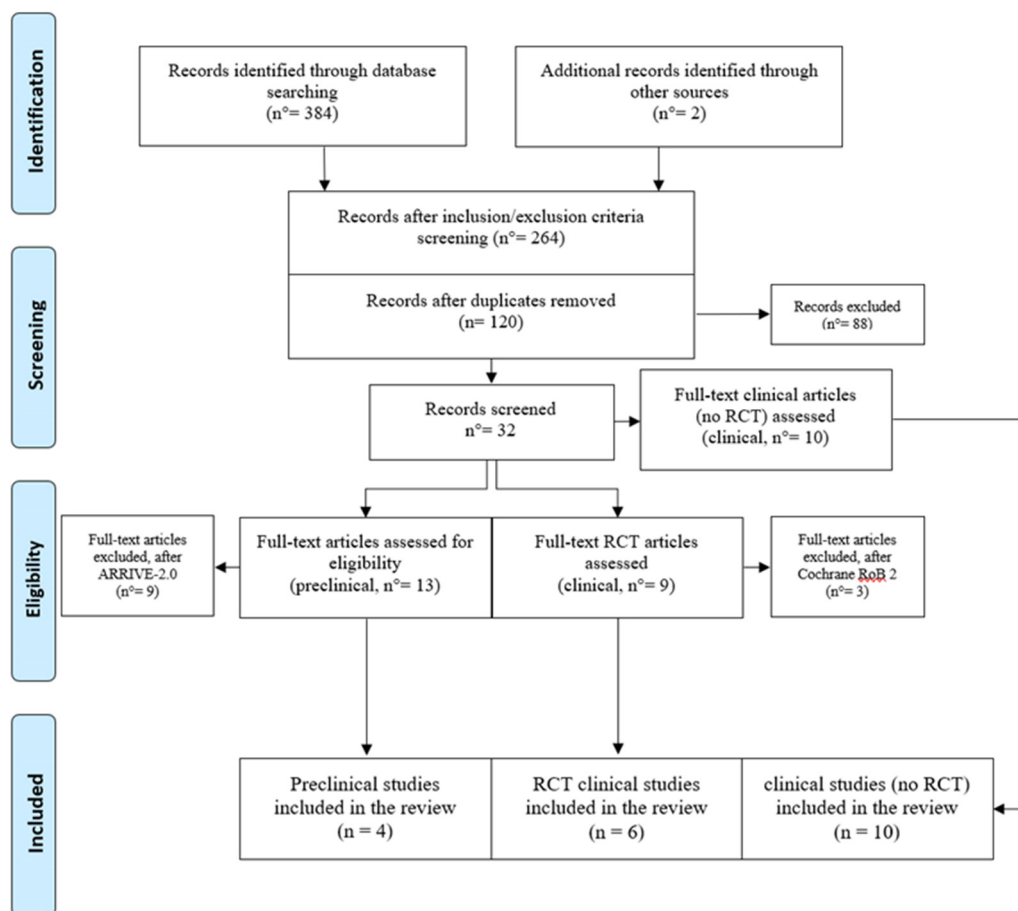

**Figure S1.** Flow chart demonstrating the selection process by PRISMA guideline.

**Table S1.** ARRIVE Essential 10 guideline. These items represent the basic data to include in a manuscript on animals' research. Without this information, readers and reviewers cannot assess the reliability of the findings. In Green the article with high score and considered sufficiently reliable. In Yellow the articles that suggest some concerns on their reliability. In Red the article excluded. Y = yes, PY = probably yes; N = no; PN = probably no.

| Article | Study design | Sample size | Inclusion and exclusion criteria | Randomisation | Blinding | Outcome measures | Statistical methods | Experimental animals | Experimental procedures | Results |
|---------|--------------|-------------|----------------------------------|---------------|----------|------------------|---------------------|----------------------|-------------------------|---------|
| 34      | Y            | Y           | N                                | N             | N        | Y                | Y                   | Y                    | Y                       | Y       |
| 35      | PY           | PN          | N                                | N             | N        | Y                | Y                   | Y                    | Y                       | Y       |
| 36      | Y            | Y           | N                                | Y             | Y        | Y                | Y                   | Y                    | Y                       | Y       |
| 37      | Y            | PN          | N                                | Y             | Y        | Y                | Y                   | Y                    | Y                       | Y       |
| 38      | Y            | PN          | N                                | N             | Y        | Y                | Y                   | Y                    | Y                       | Y       |
| 39      | Y            | PN          | N                                | Y             | Y        | Y                | Y                   | Y                    | Y                       | Y       |
| 40      | Y            | PN          | N                                | Y             | N        | Y                | Y                   | Y                    | Y                       | Y       |
| 41      | Y            | PN          | N                                | Y             | Y        | Y                | Y                   | Y                    | Y                       | Y       |
| 42      | Y            | PN          | N                                | N             | N        | Y                | Y                   | Y                    | Y                       | Y       |
| 43      | Y            | PN          | N                                | Y             | N        | Y                | Y                   | Y                    | Y                       | Y       |
| 44      | Y            | PN          | N                                | Y             | N        | Y                | Y                   | Y                    | Y                       | Y       |
| 45      | Y            | PN          | N                                | N             | N        | Y                | Y                   | Y                    | Y                       | Y       |
| 46      | Y            | PN          | N                                | Y             | N        | Y                | Y                   | Y                    | Y                       | Y       |

**Table S2.** Excluded studies. Preclinical in vivo studies on photobiomodulation and trigeminal branches nerves recovery, selected after inclusion and exclusion criteria and ARRIVE-guideline screening. The table shows the schematic design of the experimental set-up on animals and the results. BDNF = brain-derived neurotrophic factor; CGRP = calcitonin gene-related peptide; CFA = complete Freund's adjuvant; MMP = matrix metalloproteinase; MPZ = myelin protein zero; NFs = neurofilaments; NGF = nerve growth factor; OXT = oxytocin neuropeptide precursor; PBM = photobiomodulation; SP = substance P; TRPV-1 = vanilloid transient potential receptor; TGF = tumor growth factor; TEM = transmission electron microscopy.

| Study | Animal/<br>Number       | Parameters                                                                                                                                                                                                | Therapy                                                                              | Area /Damage                                                                                 | Method                                                                               | Results                                                                                            |
|-------|-------------------------|-----------------------------------------------------------------------------------------------------------------------------------------------------------------------------------------------------------|--------------------------------------------------------------------------------------|----------------------------------------------------------------------------------------------|--------------------------------------------------------------------------------------|----------------------------------------------------------------------------------------------------|
| 34    | Rat/40<br>(4<br>groups) | 904nm; 0.043 W;<br>5.95 J/cm <sup>2</sup> ; 0.3338<br>W/cm <sup>2</sup> ; pulsed 9500<br>Hz; 60 ns; 0.7J per<br>point; time = 18 sec<br>per point; distance<br>= 1cm; spot area =<br>0.13 cm <sup>2</sup> | Start: 2 days after<br>surgery<br>End = 20 days<br>after<br>10 points daily          | Trigeminal<br>nucleus/ tempo-<br>mandibular joint<br>disc injury<br>(surgery)                | Neurosensory recovery:<br>von Frey test<br>Immunoblot: SP, TRPV-<br>1; CGRP          | Reduction of pain through<br>two therapy session up to 20.<br>Decrement of SP, TRPV-1;<br>CGRP     |
| 35    | Rat/40<br>(4<br>groups) | 780nm; 0.04 W; 20<br>J/cm <sup>2</sup> ; continuous<br>wave; 08J per<br>point; time = 20 sec;<br>distance = contact;<br>spot area = 0.04<br>cm <sup>2</sup>                                               | Start:<br>immediately<br>End = 9 days<br>after<br>At the 0, 3, 5, 7, 9<br>day        | Trigeminal<br>nucleus/ tempo-<br>mandibular joint<br>inflammation<br>(injection with<br>CFA) | Evaluation of:<br>hyperalgesias and<br>allodynia.<br>Gelatin zymography:<br>MMP, TGF | Decrements of inflammation<br>Decrement of MMP                                                     |
| 38    | Rat/40<br>(4<br>groups) | 904nm; 0.07 Wpk; 6<br>J/cm <sup>2</sup> ; pulsed 9500<br>Hz; 60 ns; spot area<br>= 0.1 cm <sup>2</sup>                                                                                                    | Start: 2 days after<br>surgery<br>End = 10 days<br>after<br>1 point daily            | Mandibular<br>canal/ inferior<br>alveolar nerve<br>crush injury<br>(surgery)                 | Nerve regeneration by<br>TEM<br>Immunoblot: laminin;<br>MPZ; NFs;                    | Increment of inferior alveolar<br>nerve regeneration<br>Decrement of laminin, MPZ,<br>NFs          |
| 40    | Rat/30<br>(3<br>groups) | 810nm; 0.1W;<br>continuous wave;<br>time = 500 seconds                                                                                                                                                    | Start =<br>immediately<br>End = 2 days<br>after<br>1 point every<br>other day        | Infraorbital<br>nerve/binding by<br>6-0 silk                                                 | Neurosensory recovery:<br>electrical stimulation of<br>dental pulp                   | Cortical excitation<br>suppressed by OXT and PBM<br>together.<br>Only OXT or PBM had not<br>effect |
| 42    | Rat/27<br>(3<br>groups) | 618 nm; 6 J/cm <sup>2</sup> ;<br>0.02 W/cm <sup>2</sup> ; time =<br>300 sec; distance =<br>contact                                                                                                        | Start =<br>immediately<br>End = 21 days<br>after<br>1 point daily                    | Mental<br>nerve/nerve<br>sutured                                                             | Nerve regeneration by<br>histomorphological<br>analysis                              | Increase of regeneration by<br>ozone and PBM together.                                             |
| 43    | Rat/42<br>(5<br>groups) | 830nm, 0.03W; 6<br>J/cm <sup>2</sup> ; 0.256<br>W/cm <sup>2</sup> ; continuous<br>wave; time = 24 sec;<br>distance = contact;<br>spot area = 0.116<br>cm <sup>2</sup>                                     | Start = a day after<br>surgery<br>End = 5 week<br>after<br>1 point 3 times<br>weekly | Buccal branch of<br>facial<br>nerve/transected<br>by surgery                                 | Nerve regeneration by<br>TEM                                                         | Increase of axon regeneration                                                                      |
| 44    | Rat/42<br>(5<br>groups) | 830nm; 0.03W; 6.2<br>J/cm <sup>2</sup> ; 0.2586<br>W/cm <sup>2</sup> ; continuous<br>wave; 2.16J per<br>point; time = 24 sec;<br>distance = contact;<br>spot area = 0.116<br>cm <sup>2</sup>              | Start = a day after<br>surgery<br>End = 5 week<br>after<br>1 point 3 times<br>weekly | Facial<br>nerve/transected<br>by surgery                                                     | Nerve regeneration by<br>TEM                                                         | Increase of axon regeneration<br>and function                                                      |

|    |                         |                                                                                                                                                       |                                                                                                          |                                                      |                                                                                         |                                                                                               |
|----|-------------------------|-------------------------------------------------------------------------------------------------------------------------------------------------------|----------------------------------------------------------------------------------------------------------|------------------------------------------------------|-----------------------------------------------------------------------------------------|-----------------------------------------------------------------------------------------------|
| 45 | Rat/24<br>(5<br>groups) | 904nm; W; 6 J/cm2;<br>W/cm2; pulsed<br>9500 Hz; 60ns;<br>6J/cm2; 6J per<br>point; time = 18 sec;<br>distance = no-<br>contact; spot area =<br>0.5 cm2 | Start = two day<br>after surgery<br>End = 20 days<br>after<br>1 point every 2<br>days for 10<br>sessions | Inferior alveolar<br>nerve/Crile<br>hemostatic clamp | Nerve regeneration by<br>sensory test<br>Immunoblot: NGF,<br>BDNF                       | Increase of axon regeneration<br>Immunoblot = NGF level<br>increases, BDNF level<br>decreases |
| 46 | Rat/30<br>(3<br>groups) | 850nm; 0.1W/cm2;<br>1 or 3 MHz or<br>continuous wave;<br>4J; time = 32 sec;                                                                           | Start =<br>immediately<br>End = 21 days<br>after<br>1 point daily                                        | Left facial<br>nerve/surgical<br>clamp               | Nerve regeneration by<br>histomorphological<br>evaluation after PBM or<br>ozone therapy | Ozone therapy and PBM<br>improve nerve regeneration.<br>Ozone therapy is better than<br>PBM   |

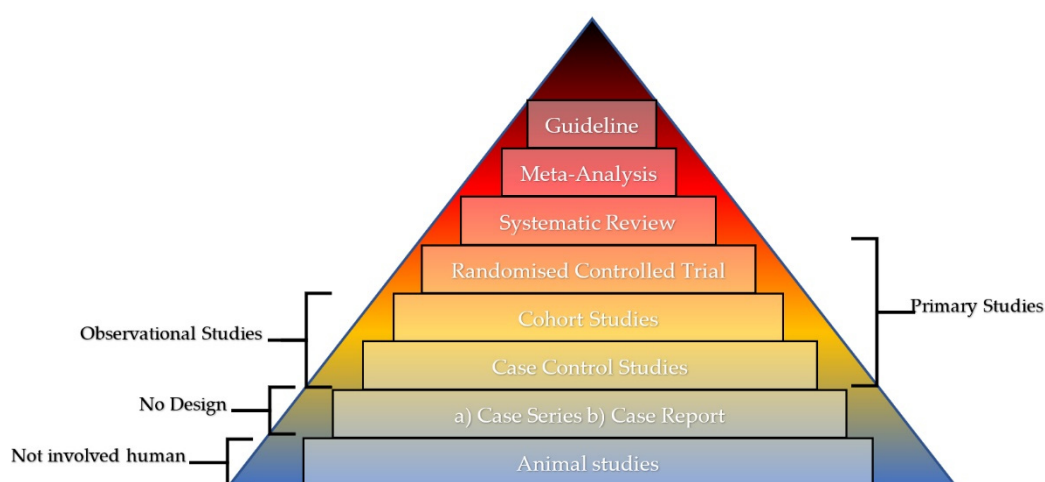

**Figure S2.** hierarchy of the clinical studies.

**Table S3.** Risk-of-bias tool for randomized trials by Cochrane RoB 2

| STUDY | A  | B  | C  | D  | E  | F | G  | Risk of bias  | Conflict of interest |
|-------|----|----|----|----|----|---|----|---------------|----------------------|
| 63    | NI | NI | PN | Y  | PN | Y | PN | High risk     | NI                   |
| 48    | PY | NI | PN | Y  | Y  | Y | PN | Some concerns | NONE                 |
| 49    | Y  | Y  | PN | Y  | Y  | Y | PN | Some concerns | NONE                 |
| 64    | NI | NI | NI | Y  | PN | Y | PN | High risk     | NONE                 |
| 47    | Y  | NI | Y  | Y  | Y  | Y | Y  | Low Risk      | NONE                 |
| 50    | Y  | Y  | PN | NI | Y  | Y | PN | Some concerns | NI                   |
| 51    | NI | NI | PN | Y  | Y  | Y | PN | Some concerns | NONE                 |
| 52    | Y  | NI | PN | NI | Y  | Y | PN | Some concerns | NONE                 |

Selection bias: (A) Random sequence generation; (B) Allocation concealment; (C) Blinding of participants and personnel; (D) Blinding of outcome assessment; (E) Complete outcome data; (F) Selective reporting; (G) other bias.
